# Supplementary material for: Csf1 from marrow adipogenic precursors is required for osteoclast formation and hematopoiesis in bone
Source: eLife. 2023 Feb 13;12:e82112. doi: 10.7554/eLife.82112 (PMC10005765; doi:10.7554/eLife.82112)
Supplement: Figure 1—source data 1. [file elife-82112-fig1-data1.xlsx]

## Sheet: Sheet1
2ˆ-ΔΔCT value
Td-	Td+
0.989657	10.44
1.00347	10.74
0.917004	9.02
1.09809	10.74
