# Supplementary material for: Csf1 from marrow adipogenic precursors is required for osteoclast formation and hematopoiesis in bone
Source: eLife. 2023 Feb 13;12:e82112. doi: 10.7554/eLife.82112 (PMC10005765; doi:10.7554/eLife.82112)
Supplement: Figure 1—source data 2. [file elife-82112-fig1-data2.xlsx]

## Sheet: Sheet1
2ˆ-ΔΔCT value
1 M	10 M
1.35341	7.06946
0.649139	2.51682
0.813154	9.6907
1.63762	2.61462
0.583013	4.58398
0.963663
