# Supplementary material for: Csf1 from marrow adipogenic precursors is required for osteoclast formation and hematopoiesis in bone
Source: eLife. 2023 Feb 13;12:e82112. doi: 10.7554/eLife.82112 (PMC10005765; doi:10.7554/eLife.82112)
Supplement: Figure 2—figure supplement 2—source data 1. [file elife-82112-fig2-figsupp2-data1.xlsx]

## Sheet: Sheet1
			3-m old							6-m old
	Ctrl							Ctrl
	Ps.Pm (mm)	Ec.Pm (mm)	Ct.TMD (mg/cm3)	Ct.Ar (mm-2)	Ct.Th (mm)			Ps.Pm (mm)	Ec.Pm (mm)	Ct.TMD (mg/cm3)	Ct.Ar (mm-2)	Ct.Th (mm)
	4.67328	3.48753	1257.62	0.683338	0.16			5.19778	3.91711	1158.25	0.847938	0.183
	5.49102	4.26687	1242.08	0.88423	0.164			5.06032	3.6976	1192.65	0.851546	0.191
	4.77615	3.57266	1272.45	0.721928	0.173			5.13802	3.78309	1202.46	0.864433	0.192
	5.09963	3.96779	1244.1	0.740318	0.155
	5.1819	3.98633	1254.15	0.781415	0.16
	4.94097	3.73806	1211.12	0.746564	0.166
	4.81182	3.69143	1206.89	0.681443	0.154
	CKO							CKO
	4.99075	3.74425	1291.62	0.79674	0.169			5.03531	3.74537	1193.99	0.794845	0.179
	5.0024	3.83357	1243.02	0.744497	0.16			5.36608	4.50826	1170.28	0.886598	0.177
	4.91184	3.67868	1254.95	0.785595	0.175			5.13695	3.82242	1182.1	0.845361	0.184
	4.80838	3.61438	1214.95	0.691065	0.158			5.36073	4.00562	1196.48	0.928522	0.196
	4.84218	3.65685	1229.39	0.72457	0.166
	4.77071	3.64224	1204.14	0.671821	0.153
