# Supplementary material for: Csf1 from marrow adipogenic precursors is required for osteoclast formation and hematopoiesis in bone
Source: eLife. 2023 Feb 13;12:e82112. doi: 10.7554/eLife.82112 (PMC10005765; doi:10.7554/eLife.82112)
Supplement: Figure 2—figure supplement 2—source data 2. [file elife-82112-fig2-figsupp2-data2.xlsx]

## Sheet: Sheet1
Max Load (N)			Energy to Fracture (mJ)			Stiffness (N/mm)
Ctrl	CKO		Ctrl	CKO		Ctrl	CKO
14.5055	15.3963		2.84761	3.09039		43.316	38.813
15.8286	18.6134		1.87185	5.34005		65.106	49.192
16.865	16.619		3.00216	1.70913		61.304	95.861
15.816	18.3198		3.00227	3.15747		47.897	65.058
16.6733	13.6186		3.32927	1.25801		45.096	75.558
