# Supplementary material for: Csf1 from marrow adipogenic precursors is required for osteoclast formation and hematopoiesis in bone
Source: eLife. 2023 Feb 13;12:e82112. doi: 10.7554/eLife.82112 (PMC10005765; doi:10.7554/eLife.82112)
Supplement: Figure 2—figure supplement 3—source data 1. [file elife-82112-fig2-figsupp3-data1.xlsx]

## Sheet: Sheet1
			3-m old								6-m old
	Ctrl								Ctrl
	VOX-BV/TV	BMD	Tb.N	Tb.Th	Tb.Sp	SMI			VOX-BV/TV	BMD	Tb.N	Tb.Th	Tb.Sp	SMI
	0.1734	200.72	4.0966	0.0429	0.2383	1.0008			0.112	156.748	3.4512	0.0337	0.2908	1.0375
	0.2373	251.71	4.5217	0.0464	0.2137	0.3699			0.125	162.19	3.4177	0.0347	0.2916	0.8575
	0.1725	200.72	3.9227	0.0445	0.2444	0.9292			0.1284	177.238	3.6786	0.0353	0.2679	0.8105
	0.2097	225.961	4.5924	0.0423	0.2064	0.6945			0.132	178.044	3.9306	0.0349	0.2486	0.9636
	0.148	199.945	4.7109	0.0311	0.2117	1.0267			0.1246	172.871	3.7656	0.0382	0.253	1.3433
	0.1088	145.395	4.1897	0.0311	0.2363	1.3522			0.1135	162.056	3.659	0.0377	0.2648	1.2947
	0.1427	171.528	4.2901	0.0353	0.2231	1.088			0.1172	162.727	3.591	0.0335	0.2697	0.9789
	0.1186	165.818	3.832	0.0323	0.2567	1.2699
	CKO								CKO
	VOX-BV/TV	BMD	Tb.N	Tb.Th	Tb.Sp	SMI			VOX-BV/TV	BMD	Tb.N	Tb.Th	Tb.Sp	SMI
	0.2613	270.37	5.0317	0.0477	0.1906	0.1777			0.1117	154.263	3.6945	0.0317	0.2695	1.0034
	0.2127	232.832	4.2574	0.0454	0.2286	0.5761			0.2116	264.974	4.8412	0.0367	0.2029	0.2136
	0.2248	236.883	4.8952	0.0408	0.1965	0.441			0.1386	185.232	3.9559	0.0315	0.2467	0.6029
	0.1489	194.234	4.2136	0.0321	0.2362	0.9335			0.1577	203.774	3.9233	0.034	0.2547	0.5649
	0.1143	145.328	4.3633	0.0297	0.2268	1.3477			0.1236	170.05	3.6316	0.0328	0.2626	0.9164
	0.1535	188.255	5.4227	0.0311	0.179	1.0919			0.1306	176.835	4.1477	0.0336	0.2338	0.999
	0.1285	174.417	4.3254	0.0324	0.2303	1.1761			0.11	153.927	3.8543	0.0308	0.2494	1.0406
