# Supplementary material for: Csf1 from marrow adipogenic precursors is required for osteoclast formation and hematopoiesis in bone
Source: eLife. 2023 Feb 13;12:e82112. doi: 10.7554/eLife.82112 (PMC10005765; doi:10.7554/eLife.82112)
Supplement: Figure 2—source data 1. [file elife-82112-fig2-data1.xlsx]

## Sheet: Sheet1
Body weight (g)
Ctrl	CKO
1-m old
14.59	15.21
16.59	16.68
13.6	13.85
15.4	13.24
15.94	16.86
14	13.95
13.28	15.31
3-m old
Ctrl	CKO
19.85	21.43
20.33	20.78
18.26	19.83
20.2	18.48
21.15	18.9
18.86	20.82
17.53
6-m old
Ctrl	CKO
22.19	21.02
23.53	21.84
22.25	21.49
24.6	24.6
25.72	23.48
	25.8
