# Supplementary material for: Csf1 from marrow adipogenic precursors is required for osteoclast formation and hematopoiesis in bone
Source: eLife. 2023 Feb 13;12:e82112. doi: 10.7554/eLife.82112 (PMC10005765; doi:10.7554/eLife.82112)
Supplement: Figure 2—source data 2. [file elife-82112-fig2-data2.xlsx]

## Sheet: Sheet1
Femur length (mm)
Ctrl	KO
1-m old
12.834	13.338
13.386	12.879
12.186	13.421
12.78	12.287
12.91	12.97
3-m old
14.46	14.992
15.729	14.156
14.548	14.77
14.053	13.806
14.682	14.856
13.41	14.568
14.316	15.024
14.82
6-m old
15.35	15.52
15.35	15.714
15.42	15.21
15.444	15.966
15.39	15.45
15.391
