# Supplementary material for: Csf1 from marrow adipogenic precursors is required for osteoclast formation and hematopoiesis in bone
Source: eLife. 2023 Feb 13;12:e82112. doi: 10.7554/eLife.82112 (PMC10005765; doi:10.7554/eLife.82112)
Supplement: Figure 2—source data 3. [file elife-82112-fig2-data3.xlsx]

## Sheet: Sheet1
2ˆ-ΔΔCT value
Bone marrow
Ctrl	CKO
1.26612	0.67459
0.667613	0.537281
0.907781	0.410015
1.30322	0.32
1	0.34
1.19
cortical bone
Ctrl	CKO
1.78643	0.5544
1.19368	0.771462
0.766	1.6309
0.612204
