# Supplementary material for: Csf1 from marrow adipogenic precursors is required for osteoclast formation and hematopoiesis in bone
Source: eLife. 2023 Feb 13;12:e82112. doi: 10.7554/eLife.82112 (PMC10005765; doi:10.7554/eLife.82112)
Supplement: Figure 2—source data 4. [file elife-82112-fig2-data4.xlsx]

## Sheet: Sheet1
	1-m old								3-m old							6-m old
	Ctrl								Ctrl							Ctrl
	BV/TV	BMD (mg/cm3)	Tb.N (mm-1)	Tb.Th (mm)	Tb.Sp (mm)	SMI			BV/TV	BMD (mg/cm3)	Tb.N (mm-1)	Tb.Th (mm)	Tb.Sp (mm)	SMI		BV/TV	BMD (mg/cm3)	Tb.N (mm-1)	Tb.Th (mm)	Tb.Sp (mm)	SMI
	0.0868	148.956	3.9272	0.0425	0.2509	2.0672			0.0517	106.044	3.714	0.0341	0.2614	2.866		0.0236	70.5578	2.6182	0.0293	0.3769	2.6357
	0.0483	84.7326	3.6166	0.0276	0.2749	2.4856			0.0682	119.714	3.7208	0.0399	0.2634	2.6845		0.042	97.7653	2.825	0.0306	0.3521	2.2351
	0.0675	95.9185	4.0455	0.0362	0.2454	2.4937			0.0407	96.4971	3.3626	0.0351	0.2944	3.1064		0.022	64.243	2.731	0.0266	0.3613	2.5977
	0.0715	101.126	3.557	0.037	0.2835	2.3813			0.0677	121.811	3.6977	0.0409	0.2644	2.7084		0.0213	67.1989	2.3152	0.0285	0.4379	3.121
									0.057	123.874	3.7416	0.044	0.265	3.051
									0.0315	77.4773	3.35	0.0286	0.2956	2.9825
									0.0444	89.4351	3.6925	0.0313	0.27	2.8479
	Csf1 CKO								0.0382	83.3218	3.778	0.0287	0.2615	2.964
	0.0351	74.1183	3.8369	0.0243	0.2605	2.7376			Csf1 CKO							Csf1 CKO
	0.0474	90.9803	4.4168	0.0244	0.2243	2.6358			0.108	155.226	4.1492	0.0416	0.2306	2.0255		0.0591	111.873	3.2519	0.0304	0.2989	1.6
	0.0521	95.5484	4.3183	0.0274	0.2302	2.651			0.1	151.61	4.1597	0.0396	0.2287	2.2445		0.1153	173.073	3.6122	0.0394	0.2684	1.1715
	0.0519	95.2125	4.3903	0.0259	0.2267	2.6051			0.1196	163.688	4.2888	0.04	0.2226	1.9069		0.0957	152.785	3.4706	0.0369	0.2785	1.3957
	0.0729	112.192	4.353	0.0355	0.2269	2.61			0.0885	165.895	4.173	0.04335	0.2346	2.404		0.1061	161.384	3.4324	0.039	0.2812	1.2563
	0.0584	97.0757	3.9827	0.0321	0.2515	2.582			0.0661	117.046	3.8752	0.03	0.2528	2.1015
									0.0691	120.136	4.0969	0.0324	0.2414	2.4032
									0.0724	121.076	4.0096	0.0312	0.2454	1.9938
									0.0667	116.844	4.2703	0.0299	0.2309	2.3569
