# Supplementary material for: Csf1 from marrow adipogenic precursors is required for osteoclast formation and hematopoiesis in bone
Source: eLife. 2023 Feb 13;12:e82112. doi: 10.7554/eLife.82112 (PMC10005765; doi:10.7554/eLife.82112)
Supplement: Figure 3—source data 1. [file elife-82112-fig3-data1.xlsx]

## Sheet: Sheet1
Femur length (mm)
Ctrl	KO
13.782	12.472
14.172	12.474
13.965	12.475
15	13.254
15.4	13.358
	13.1
	12.2
	11.5
