# Supplementary material for: Csf1 from marrow adipogenic precursors is required for osteoclast formation and hematopoiesis in bone
Source: eLife. 2023 Feb 13;12:e82112. doi: 10.7554/eLife.82112 (PMC10005765; doi:10.7554/eLife.82112)
Supplement: Figure 3—source data 2. [file elife-82112-fig3-data2.xlsx]

## Sheet: Sheet1
Ctrl
VOX-BV/TV	BMD	Tb.N	Tb.Th	Tb.Sp	SMI
0.0492	96.9592	4.6088	0.0256	0.2132	2.7319
0.0545	101.124	4.3894	0.027	0.2216	2.6406
0.0965	149.829	4.1615	0.0443	0.2371	2.3964
0.0433	83.5906	4.0923	0.027	0.2559	2.8271
0.041	86.9495	4.0701	0.0279	0.2445	3.0783
Prrx1 CKO
VOX-BV/TV	BMD	Tb.N	Tb.Th	Tb.Sp	SMI
0.5091	556.799	9.6871	0.0724	0.1185	-3.2473
0.2949	349.082	7.8788	0.0528	0.128	0.4603
0.6188	667.376	10.7951	0.0965	0.0979	-5.0077
0.7483	826.993	11.9888	0.1103	0.0906	-10.1805
0.5168	573.795	10.4778	0.0855	0.0948	-1.5663
0.3125	365.272	7.4008	0.0593	0.1401	0.4367
0.7008	745.841	10.3316	0.0999	0.1425	-10.7236
0.6423	675.437	11.3444	0.0883	0.1051	-6.674
