# Supplementary material for: Csf1 from marrow adipogenic precursors is required for osteoclast formation and hematopoiesis in bone
Source: eLife. 2023 Feb 13;12:e82112. doi: 10.7554/eLife.82112 (PMC10005765; doi:10.7554/eLife.82112)
Supplement: Figure 3—source data 3. [file elife-82112-fig3-data3.xlsx]

## Sheet: Sheet1
Ctrl
Ps.Pm (mm)	Ec.Pm (mm)	Ct. TMD	Ct.Ar (mm2)	Ct.Th (mm)
4.5584	3.51939	1123.39	0.616151	0.138
4.75022	3.69921	1123.52	0.556186	0.13
5.89521	4.52798	1121.98	1.01357	0.189
5.0356	4.04483	1032.56	0.613058	0.127
4.93806	4.05071	1004.88	0.55945	0.113
Prrx1 CKO
Ps.Pm (mm)	Ec.Pm (mm)	Ct. TMD	Ct.Ar (mm2)	Ct.Th (mm)
5.15941	4.13994	1073.47	0.682474	0.127
5.15976	4.16198	1091.14	0.672852	0.115
6.28022	4.66212	1118.82	1.17302	0.196
5.83349	5.41313	1021.95	0.928179	0.126
5.7903	4.90396	984.259	1.08179	0.113
5.5936	4.23968	935.487	1.08368	0.119
5.65093	4.50523	923.731	1.03196	0.092
5.85732	4.89672	926.216	0.83941	0.093
