# Supplementary material for: Csf1 from marrow adipogenic precursors is required for osteoclast formation and hematopoiesis in bone
Source: eLife. 2023 Feb 13;12:e82112. doi: 10.7554/eLife.82112 (PMC10005765; doi:10.7554/eLife.82112)
Supplement: Figure 4—source data 1. [file elife-82112-fig4-data1.xlsx]

## Sheet: Sheet1
Oc.S/BS (%)			Oc.S/L (%)			Oc.S/BS (%)
Ctrl	CKO		Ctrl	CKO		Ctrl	CKO
32.06	14.29		33.82	30.16		2.11	2.24
20.3	12.75		31.76	30.71		2.15	1.61
31.4	11.61		30.9	34		2.14	1.28
35.2	10.7		34.8	31.84		1.65	2.1
28.6	11.76		33.36	31.65		1.88	2.23
			32.928	32.6
