# Supplementary material for: Csf1 from marrow adipogenic precursors is required for osteoclast formation and hematopoiesis in bone
Source: eLife. 2023 Feb 13;12:e82112. doi: 10.7554/eLife.82112 (PMC10005765; doi:10.7554/eLife.82112)
Supplement: Figure 4—source data 2. [file elife-82112-fig4-data2.xlsx]

## Sheet: Sheet1
OCs/field
Ctrl	CKO
79	99
89	99
83	56
59	79
92	89
83	73
86	50
