# Supplementary material for: Csf1 from marrow adipogenic precursors is required for osteoclast formation and hematopoiesis in bone
Source: eLife. 2023 Feb 13;12:e82112. doi: 10.7554/eLife.82112 (PMC10005765; doi:10.7554/eLife.82112)
Supplement: Figure 4—source data 3. [file elife-82112-fig4-data3.xlsx]

## Sheet: Sheet1
OB.S/BS (%)
Ctrl	CKO
11.5817	6.30309
7.24829	5.54691
5.36028	9.41734
4.20548	6.06921
7.76902	7.60036
10.2355	11.2308
23.2885	9.4134
13.8293	5.65623
12.9508
3.4233
11.9548
13.7316
