# Supplementary material for: Csf1 from marrow adipogenic precursors is required for osteoclast formation and hematopoiesis in bone
Source: eLife. 2023 Feb 13;12:e82112. doi: 10.7554/eLife.82112 (PMC10005765; doi:10.7554/eLife.82112)
Supplement: Figure 4—source data 4. [file elife-82112-fig4-data4.xlsx]

## Sheet: Sheet1
MAR (µm/day)			MS/BS			BFR/BS (µm3/µm2/day)
Ctrl	CKO		Ctrl	CKO		Ctrl	CKO
0.539936	0.475878		0.539936	0.475878		0.0184825	0.04283
0.559853	0.610279		0.559853	0.610279		0.0204741	0.0491919
0.59331	0.582359		0.59331	0.582359		0.0344202	0.0312267
0.585318	0.52772		0.585318	0.52772		0.0356018	0.0309248
