# Supplementary material for: Csf1 from marrow adipogenic precursors is required for osteoclast formation and hematopoiesis in bone
Source: eLife. 2023 Feb 13;12:e82112. doi: 10.7554/eLife.82112 (PMC10005765; doi:10.7554/eLife.82112)
Supplement: Figure 4—source data 5. [file elife-82112-fig4-data5.xlsx]

## Sheet: Sheet1
ELISA of CTX-1 (ng/ml)			ELISA of PINP (ng/ml)
Ctrl	CKO		Ctrl	CKO
1.92283	2.24348		45.59	44.87
3.22681	2.26486		35.73	44.27
1.752	1.089		43.54	45.37
3.376	2.008		49.28	41.1
4.23	2.478		37.26	40.15
3.332	2.35		37.39	36.63
4.102			36.76	44.83
				43.51
