# Supplementary material for: Csf1 from marrow adipogenic precursors is required for osteoclast formation and hematopoiesis in bone
Source: eLife. 2023 Feb 13;12:e82112. doi: 10.7554/eLife.82112 (PMC10005765; doi:10.7554/eLife.82112)
Supplement: Figure 5—source data 1. [file elife-82112-fig5-data1.xlsx]

## Sheet: Sheet1
Des.area (%)
Ctrl		CKO
Veh	LPS	Veh	LPS
0	10.6383	0.016666	2.43902
0.016666	16.2162	0.111474	0.161405
0	9.09091	0.077383	3.45876
0.404894	10.9091	0	1.03
0	12.5	0	4.76
1.01605	19	0	2.94118
0	14	0	0.487674
0.029762	13	0
0	10.4	0
0	10.5	0
0	11.9
0
0
0.145
0
0
