# Supplementary material for: Csf1 from marrow adipogenic precursors is required for osteoclast formation and hematopoiesis in bone
Source: eLife. 2023 Feb 13;12:e82112. doi: 10.7554/eLife.82112 (PMC10005765; doi:10.7554/eLife.82112)
Supplement: Figure 5—source data 2. [file elife-82112-fig5-data2.xlsx]

## Sheet: Sheet1
Oc.N/BS (mm-1)
Ctrl		CKO
Veh	LPS	Veh	LPS
0	3.46154	0.294118	0.886525
0	2.91667	0	1.12486
0	3.15789	0.31348	1.38889
0	3.79747
0.505051	2.58621
0	4.90798
0.529101	5.45455
0
0
