# Supplementary material for: Csf1 from marrow adipogenic precursors is required for osteoclast formation and hematopoiesis in bone
Source: eLife. 2023 Feb 13;12:e82112. doi: 10.7554/eLife.82112 (PMC10005765; doi:10.7554/eLife.82112)
Supplement: Figure 6—figure supplement 1—source data 1. [file elife-82112-fig6-figsupp1-data1.xlsx]

## Sheet: HCT
HCT(%)
WT	CKO
52.8	47.4
54.5	48.2
52.5	50.2
49.2
49.3

## Sheet: report
Date	Meas. Date	2021-08-19	2021-08-19	2021-08-19	2021-08-19	2021-08-19	2021-08-19	2021-08-19	2021-08-19	2021-08-19
SAMPLE NO.	SAMPLE NO.	Ctrl 2	Ctrl 4	Ctrl 5	Ctrl 6	Ctrl 7	cko 2	cko 3	cko 6	cko 8
Sample Inf.	Sample Inf.	M	M	M	A	A	M	M	M	M
Samp. Mode	Samp. Mode	Manual	Manual	Manual	Manual	Manual	Manual	Capillary	Manual	Manual
Animal Species	Animal Species	Mouse	Mouse	Mouse	Mouse	Mouse	Mouse	Mouse	Mouse	Mouse
Discrete Info.	Discrete Info.	CBC+DIFF+RET	CBC+DIFF+RET	CBC+DIFF+RET	CBC+DIFF+RET	CBC+DIFF+RET	CBC+DIFF+RET	CBC+DIFF+RET	CBC+DIFF+RET	CBC+DIFF+RET
Operator	Courtney Schmidt
Parameters	Sample Comment							clotted
White blood cell	WBC(10/uL)	318	387	397	384	311	328	1129	272	428
Red blood cell	RBC(10^4/uL)	1035	1103	1113	996	1008	955	980	965	1019
Hemoglobin	HGB(g/L)	164	170	167	151	153	144	153	146	153
Hematocrit	HCT(10^(-1)%)	528	545	525	492	493	474	507	482	502
Mean corpuscular volume	MCV(10^(-1)fL)	510	494	472	494	489	496	517	499	493
Mean corpuscular hemoglobin	MCH(10^(-1)pg)	158	154	150	152	152	151	156	151	150
Mean corpuscular hemoglobin concentration	MCHC(g/L)	311	312	318	307	310	304	302	303	305
Platelets	PLT(10^3/uL)	1540	1490	1565	1520	1640	2040	943	1634	1797
Standard Deviation in Red Cell Distribution Width	RDW-SD(10^(-1)fL)	314	307	294	301	304	304	231	328	316
Coeff. of Variation in Red Cell Distribution Width	RDW-CV(10^(-1)%)	212	215	218	204	208	200	129	215	214
Platelet Distribution Width	PDW(10^(-1)fL)	72	76	71	71	70	70	66	69	72
Mean Platelet Volume	MPV(10^(-1)fL)	65	66	64	65	64	65	74	65	65
Platelet larger cell ratio	P-LCR(10^(-1)%)	37	40	34	38	34	39	69	44	39
Plateletcrit	PCT(10^(-2)%)	101	98	100	99	105	133	70	107	116
Neutrophils	NEUT#(10/uL)	31	41	42	45	38	45	----	19	28
Lymphocytes	LYMPH#(10/uL)	266	329	325	300	256	260	----	237	368
Monocytes	MONO#(10/uL)	8	10	12	11	7	9	----	6	9
Eosinophils	EO#(10/uL)	8	6	13	22	7	8	----	4	19
Basophils	BASO#(10/uL)	5	1	5	6	3	6	2	6	4
% Neutrophils	NEUT%(10^(-1)%)	98	105	105	117	121	138	----	70	66
% Lymphocytes	LYMPH%(10^(-1)%)	836	850	819	781	823	793	----	871	860
% Monocytes	MONO%(10^(-1)%)	25	26	30	29	23	27	----	22	21
% Eosinophils	EO%(10^(-1)%)	25	16	33	57	23	24	----	15	44
% Basophils	BASO%(10^(-1)%)	16	3	13	16	10	18	2	22	9
Reticulocytes	RET#(10^2uL)	5879	5835	5632	6474	5615	5195	4165	9978	10455
Reticulocytes Percent	RET%(10^(-2)%)	568	529	506	650	557	544	425	1034	1026
Low fluorescence ratio of reticulocytes	LFR(10^(-1)%)	550	586	600	441	465	431	479	510	384
Middle fluorescence ratio of reticulocytes	MFR(10^(-1)%)	238	253	255	229	242	235	245	224	221
High fluorescence ratio of reticulocytes	HFR(10^(-1)%)	212	161	145	330	293	334	276	266	395
Immature reticulocyte fraction	IRF(10^(-1)%)	450	414	400	559	535	569	521	490	616
Red blood cells measured optically	RBC-O(10^4/uL)	1067	1089	1084	989	1001	952	917	985	1012
Platelets measured with impedance	PLT-I(10^3/uL)	1540	1490	1565	1520	1640	2040	943	1634	1797
Platelets measured optically	PLT-O(10^3/uL)	1240	1152	1203	1129	1278	1583	833	1245	1384
