# Supplementary material for: Csf1 from marrow adipogenic precursors is required for osteoclast formation and hematopoiesis in bone
Source: eLife. 2023 Feb 13;12:e82112. doi: 10.7554/eLife.82112 (PMC10005765; doi:10.7554/eLife.82112)
Supplement: Figure 6—figure supplement 1—source data 2. [file elife-82112-fig6-figsupp1-data2.xlsx]

## Sheet: 1
Spleen Weight (mg)
Ctrl	CKO
68.1	64.39
82.51	69.93
76.71	61.01
	86.63
