# Supplementary material for: Csf1 from marrow adipogenic precursors is required for osteoclast formation and hematopoiesis in bone
Source: eLife. 2023 Feb 13;12:e82112. doi: 10.7554/eLife.82112 (PMC10005765; doi:10.7554/eLife.82112)
Supplement: Figure 6—source data 1. [file elife-82112-fig6-data1.xlsx]

## Sheet: Sheet1
Cell count/tibia (x106)
1-m old
Ctrl	KO
8.64	7.79
10.41	12.49
11.52	7.67
	6.727
	14.26
	9.97
3-m old
Ctrl	KO
13.4	12.4
12	11.8
13.6	11.2
14.6	10.4
10.8	7.14
6-m old
Ctrl	KO
12.6	8.2
14.2	8.2
18.2	9.2
	8.2
