# Supplementary material for: Csf1 from marrow adipogenic precursors is required for osteoclast formation and hematopoiesis in bone
Source: eLife. 2023 Feb 13;12:e82112. doi: 10.7554/eLife.82112 (PMC10005765; doi:10.7554/eLife.82112)
Supplement: Figure 6—source data 2. [file elife-82112-fig6-data2.xlsx]

## Sheet: Sheet1
Flow analysis of CD11b+F4/80+(%)
1-m old
Ctrl	KO
1.68333	1.42333
1.92667	0.96
1.38	0.74
	0.833333
	1.35333
3-m old
Ctrl	KO
1.12	0.57
1.77	0.074
0.6	0.53
1.5	0.56
6-m old
Ctrl	KO
1.51	0.65
2.23	0.98
1.5	1.02
	0.78
