# Supplementary material for: Csf1 from marrow adipogenic precursors is required for osteoclast formation and hematopoiesis in bone
Source: eLife. 2023 Feb 13;12:e82112. doi: 10.7554/eLife.82112 (PMC10005765; doi:10.7554/eLife.82112)
Supplement: Figure 6—source data 3. [file elife-82112-fig6-data3.xlsx]

## Sheet: BM flow analysis
CSF1 CKO mice
Bone Marrow from 1 femurs were collected and analyzed 20210819														Cell Counts
			% of Live Cells
	Experiement	Mouse	Lineage-cKit+	LSK	SLAM-LSK	MPP	LSKCD150+CD48+	LSKCD48-CD150-	Lineage+	Heme (Total)	Non-heme (Lineage-cKit-)			Cell Count per femur		Lineage-cKit+	LSK	SLAM-LSK	MPP	LSKCD150+CD48+	LSKCD48-CD150-	Lineage+	Heme (Total)	Non-heme (Lineage-cKit-)
		Ctrl 2	2.65	0.067	0.013	0.044	0.00754	0.00342	95.6	98.25	1.49			18000000		477000	12060	2340	7920	1357.2	615.6	17208000	17685000	268200
		Ctrl 4	5.22	0.16	0.032	0.09	0.022	0.014	91.3	96.52	3.28			2.18333e+07		1.1397e+06	34933.3	6986.67	19650	4803.33	3056.67	1.99338e+07	2.10735e+07	716133
		Ctrl 5	4.23	0.12	0.029	0.061	0.013	0.015	92.9	97.13	2.69			17000000		719100	20400	4930	10370	2210	2550	15793000	16512100	457300
		Ctrl 6	2.9	0.1	0.024	0.052	0.00689	0.017	95.2	98.1	1.78			1.81667e+07		526833	18166.7	4360	9446.67	1251.68	3088.33	1.72947e+07	1.78215e+07	323367
		Ctrl 7	2.5	0.087	0.019	0.042	0.00936	0.016	95.9	98.4	1.49			2.33333e+07		583333	20300	4433.33	9800	2184	3733.33	2.23767e+07	2.296e+07	347667
		Average	3.5	0.1068	0.0234	0.0578	0.011758	0.013084	94.18	97.68	2.146			1.96667e+07		689193	21172	4610	11437.3	2361.24	2608.79	1.85212e+07	1.92104e+07	422533
		SD	1.18044	0.03545	0.00763544	0.0194987	0.0061984	0.00551682	1.99675	0.81667	0.802577			2.75126e+06		267602	8408.2	1658.13	4679.81	1436.78	1190.74	2.62355e+06	2.69571e+06	177952
	Experiement	Mouse	Lineage-cKit+	LSK	SLAM-LSK	MPP	LSKCD150+CD48+	LSKCD48-CD150-	Lineage+	Heme (Total)	Non-heme (Lineage-cKit-)			Cell Count per femur		Lineage-cKit+	LSK	SLAM-LSK	MPP	LSKCD150+CD48+	LSKCD48-CD150-	Lineage+	Heme (Total)	Non-heme (Lineage-cKit-)
		CKO 2	2.15	0.1	0.023	0.044	0.00972	0.026	96.1	98.25	1.2			1.83333e+07		394167	18333.3	4216.67	8066.67	1782	4766.67	1.76183e+07	18012500	220000
		CKO 3	1.78	0.032	0.00806	0.016	0.00495	0.00312	97.1	98.88	1.05			1.98333e+07		353033	6346.67	1598.57	3173.33	981.75	618.8	1.92582e+07	1.96112e+07	208250
		CKO 6	1.8	0.063	0.015	0.03	0.0052	0.013	96.7	98.5	1.35			21000000		378000	13230	3150	6300	1092	2730	20307000	20685000	283500
		CKO 8	2	0.09	0.018	0.044	0.01	0.018	96.6	98.6	1.3			1.63333e+07		326667	14700	2940	7186.67	1633.33	2940	1.5778e+07	1.61047e+07	212333
		Average	1.9325	0.07125	0.016015	0.0335	0.0074675	0.01503	96.625	98.5575	1.225			18875000		362967	13152.5	2976.31	6181.67	1372.27	2763.87	18240375	1.86033e+07	231021
		SD	0.17576	0.0304781	0.00624614	0.013404	0.00276687	0.00957655	0.411299	0.26056	0.132288			2.01556e+06		25669.8	4459.43	841.674	2108.28	348.75	1283.82	2.37078e+06	2.39542e+06	42316.1
