# Supplementary material for: Csf1 from marrow adipogenic precursors is required for osteoclast formation and hematopoiesis in bone
Source: eLife. 2023 Feb 13;12:e82112. doi: 10.7554/eLife.82112 (PMC10005765; doi:10.7554/eLife.82112)
Supplement: Figure 6—source data 4. [file elife-82112-fig6-data4.xlsx]

## Sheet: vessel quantification
	Neutrophils (%)			Eosinophils (%)			Monocytes (%)			B cells (%)			T cells (%)			Erythroid Progenitors (%)
	Ctrl	CKO		Ctrl	CKO		Ctrl	CKO		Ctrl	CKO		Ctrl	CKO		Ctrl	CKO
	44.9	45.7		8.8872	6.3648		13.4679	12.351		17.1392	19.3924		1.90082	2.75648		4.64	5.06
	45.3	48.2		7.6033	6.4232		12.1203	10.9635		19.6434	19.3795		1.84983	2.1896		4.41	4.4
	32.8	40.4		7.2468	5.9843		11.1502	9.65668		26.9268	18.8197		2.86728	2.00928		7.02	3.18
	44.2	34.6		9.6976	7.1478		13.114	9.48369		15.5223	19.2123		1.94258	1.6337		7.73667	3.26
	45.1	44.5		7.3845	8.8404		12.067	10.5386		18.9609	19.7091		2.44728	2.3424		8.92667	3.43
	34.2			8.0228			12.134			26.7795			2.84589			10.1167
