# Supplementary material for: Csf1 from marrow adipogenic precursors is required for osteoclast formation and hematopoiesis in bone
Source: eLife. 2023 Feb 13;12:e82112. doi: 10.7554/eLife.82112 (PMC10005765; doi:10.7554/eLife.82112)
Supplement: Figure 6—source data 5. [file elife-82112-fig6-data5.xlsx]

## Sheet: vessel quantification
	Vessel diameter (µm)			Vessel area (mm2)			Vessel density (mm-2)
	Ctrl	CKO		Ctrl	CKO		Ctrl	CKO
	11.4259	7.27121		0.000616	0.000382		138.161	155.431
	6.30178	11.789		0.000314	0.000515		145.836	153.512
	9.58145	9.16311		0.000517	0.000312		161.188	168.863
	9.67722	6.16677		0.000782	0.000357		130.485	161.188
	7.3573	10.2213		0.000542	0.000477		176.539	138.161
	9.87123	7.77442		0.000945	0.000472		138.161	161.188
	6.765	9.58		0.000777	0.000865		207.241	115.134
	10.987	7.94744		0.001104	0.001104		161.188	184.214
	8.679			0.000522			184.214
	9.463			0.000425			184.214
	10.643			0.000275			161.188
	10.982			0.000359			184.214
	7.397			0.000501			161.188
	9.932			0.00076			230.268
	6.2356			0.000692			138.161
